# Supplementary material for: Isolation and Identification of Phytocompounds from Maytenus dhofarensis and Their Biological Potentials
Source: MDPI journal article supplement (doi:10.3390/molecules28166077), 2023-08-15
Supplement: s1 [file s1]

## Isolation and Identification of Phytocompounds from *Maytenus dhofarensis* and Their Biological Potentials

Fatma Al-Rubai<sup>1</sup>, Zakiya Zahran Al-Shariqi<sup>1</sup>, , Khalsa S. Al-Shabibi<sup>1</sup>, John Husband<sup>1</sup>, Asmaa M. Al-Hattali<sup>1</sup>, Marcia Goetttert<sup>2</sup>, Stefan Laufer<sup>2,3</sup>, Younis Baqi<sup>1</sup>, and Syed Imran Hassan<sup>1\*</sup>  
Majekodunmi O. Fatope<sup>1\*</sup>

<sup>1</sup>Department of Chemistry, College of Science, Sultan Qaboos University, PO Box 36, Al Khod, Muscat 123, Oman; F.A-R: s87268@student.squ.edu.om; Z.Z.A-S.: zaak338@hotmail.com; K.S.A-S: pulslife93@gmail.com; J.H.: johnh@squ.edu.om; A.M.A-H: asmaa.alhattali@live.com; Y.B.: baqi@squ.edu.om; S.I.H.: s.hasan@squ.edu.om; M.O.F: majekmof@gmail.com

<sup>2</sup>Department of Pharmaceutical and Medicinal Chemistry, Institute of Pharmacy, Eberhard Karls Universität Tübingen, D-72076 Tübingen, Germany; M.G: marcia.goetttert@univates.br; S.L: stefan.laufer@uni-tuebingen.de

<sup>3</sup>Tübingen Center for Academic Drug Discovery (TüCAD2), D-72076 Tübingen, Germany; stefan.laufer@uni-tuebingen.de

## Supporting Information

\*Correspondence: S.I.H.: s.hasan@squ.edu.om; M.O.F: majekmof@gmail.com

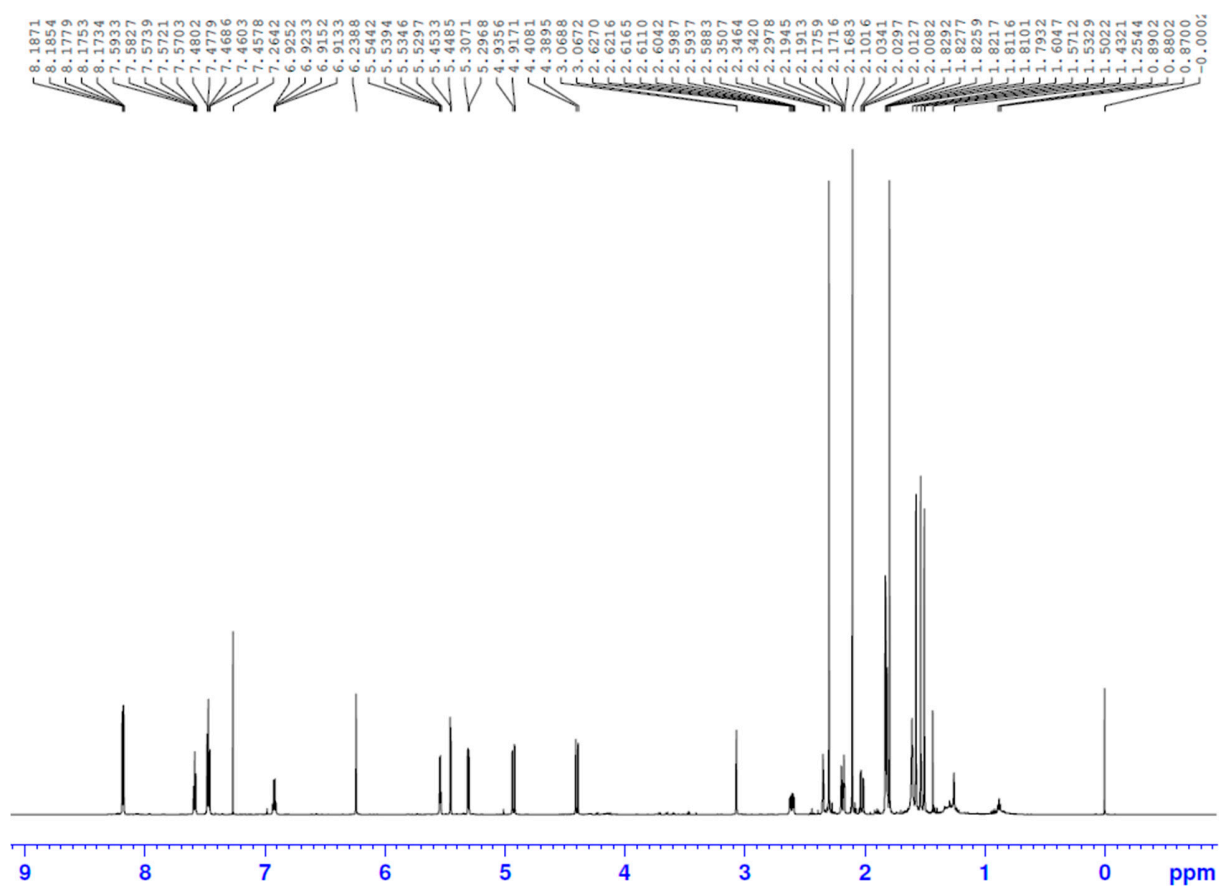

**Figure S1:**  $^1\text{H}$  NMR spectrum (700 MHz, Chloroform-*d*) of compound **1**

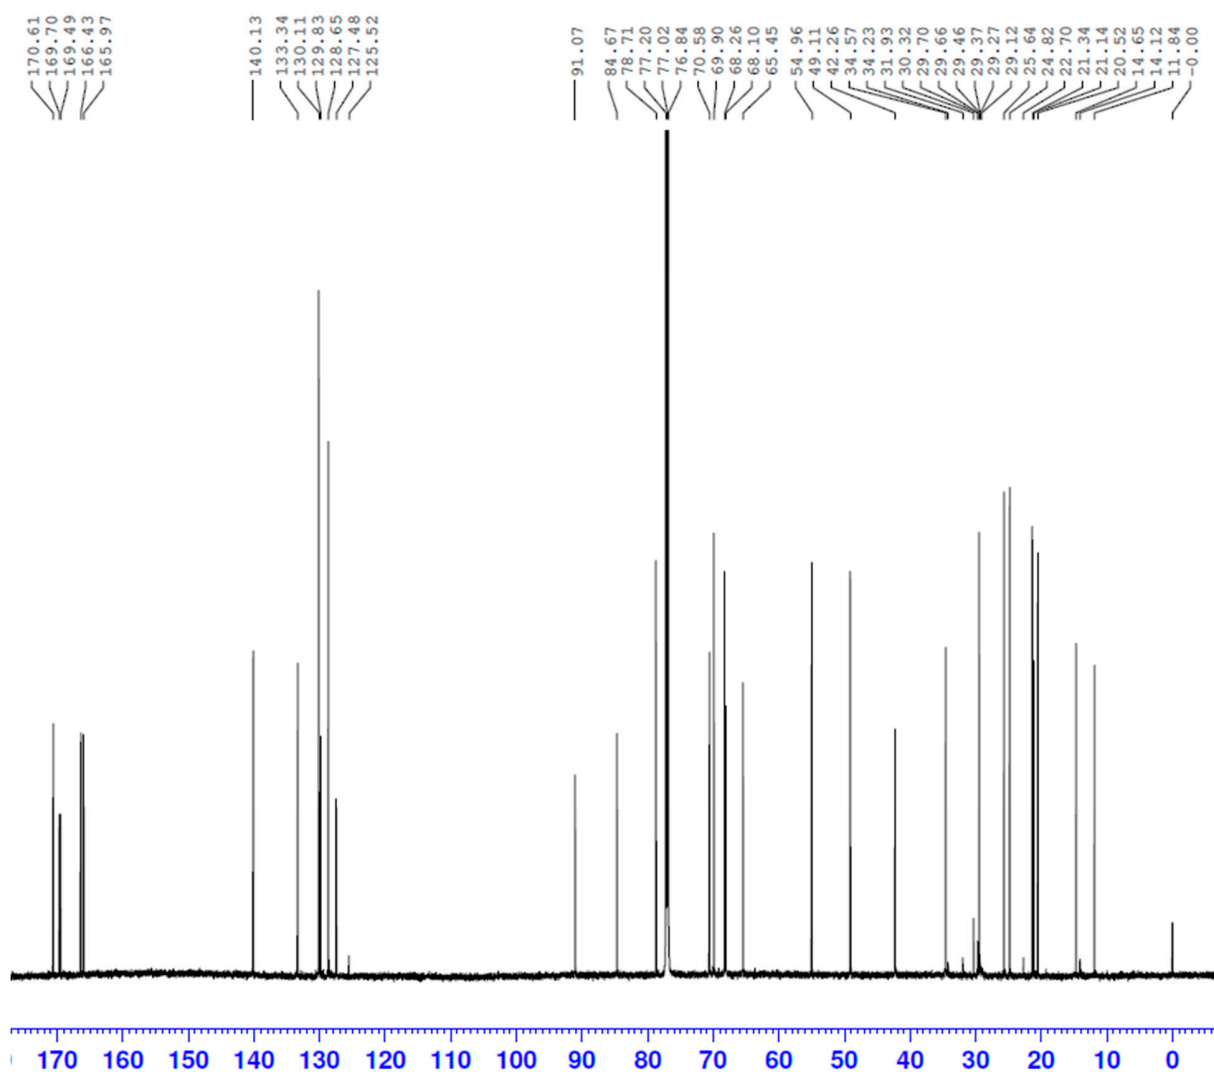

**Figure S2:**  $^{13}\text{C}$  NMR spectrum (176 MHz, Chloroform-*d*) of compound **1**

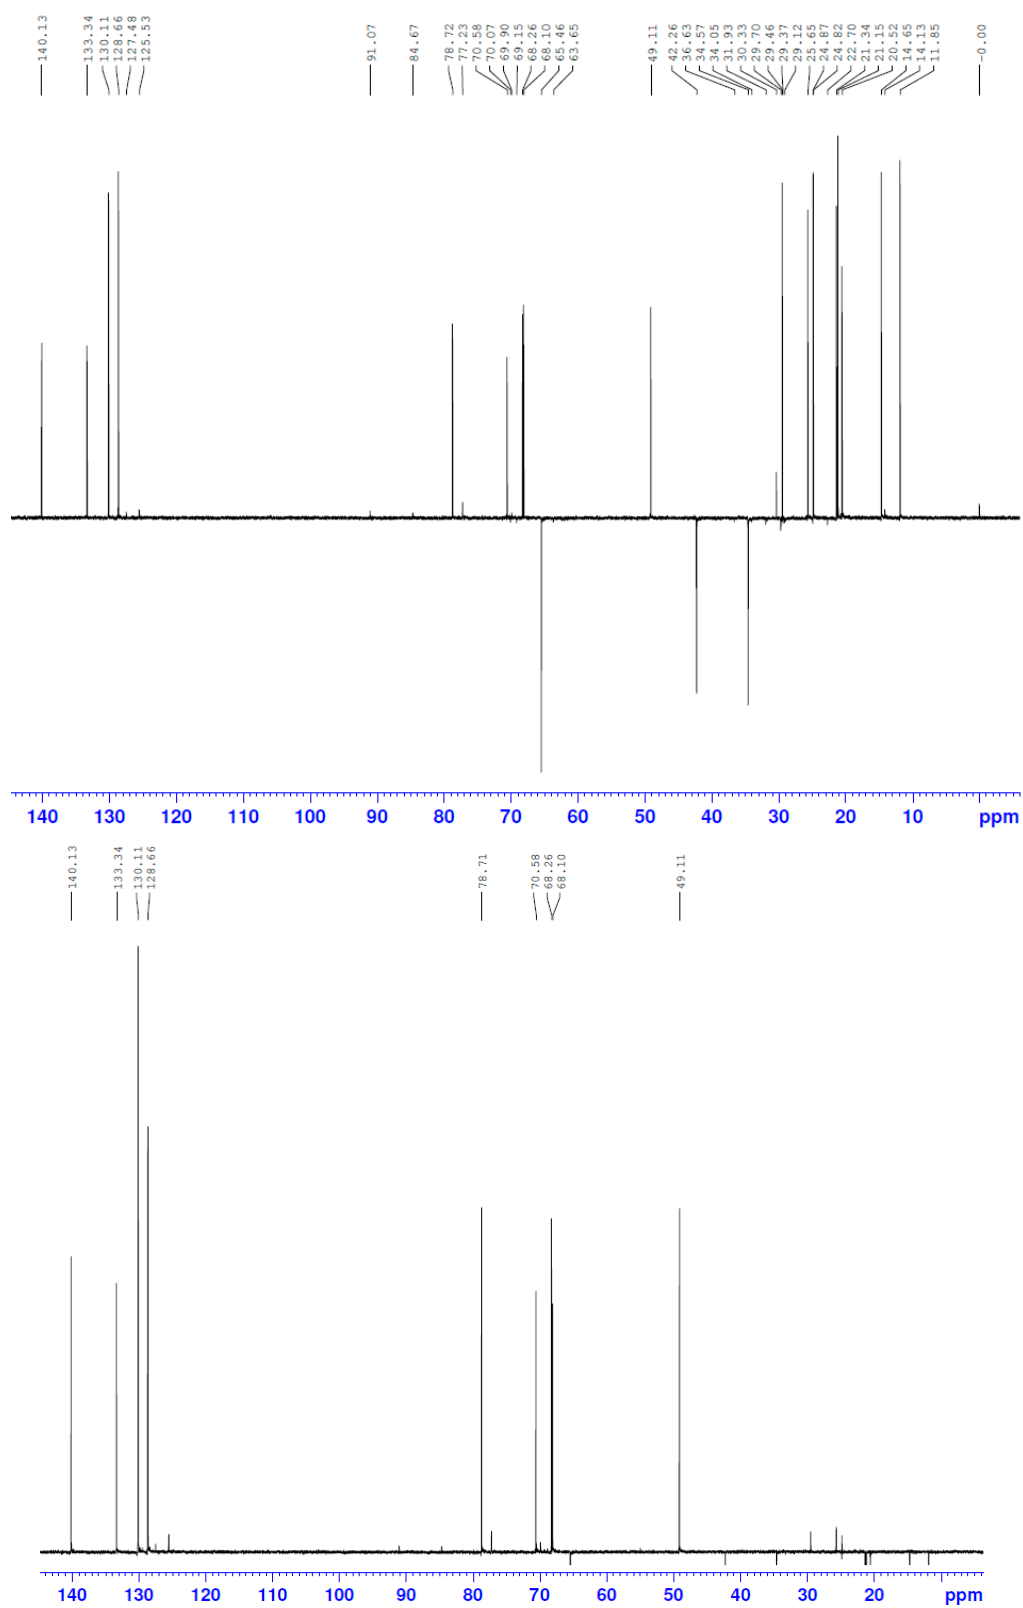

**Figure S3:** DEPT-135 and 90 spectra (176 MHz, Chloroform-*d*) of compound **1**

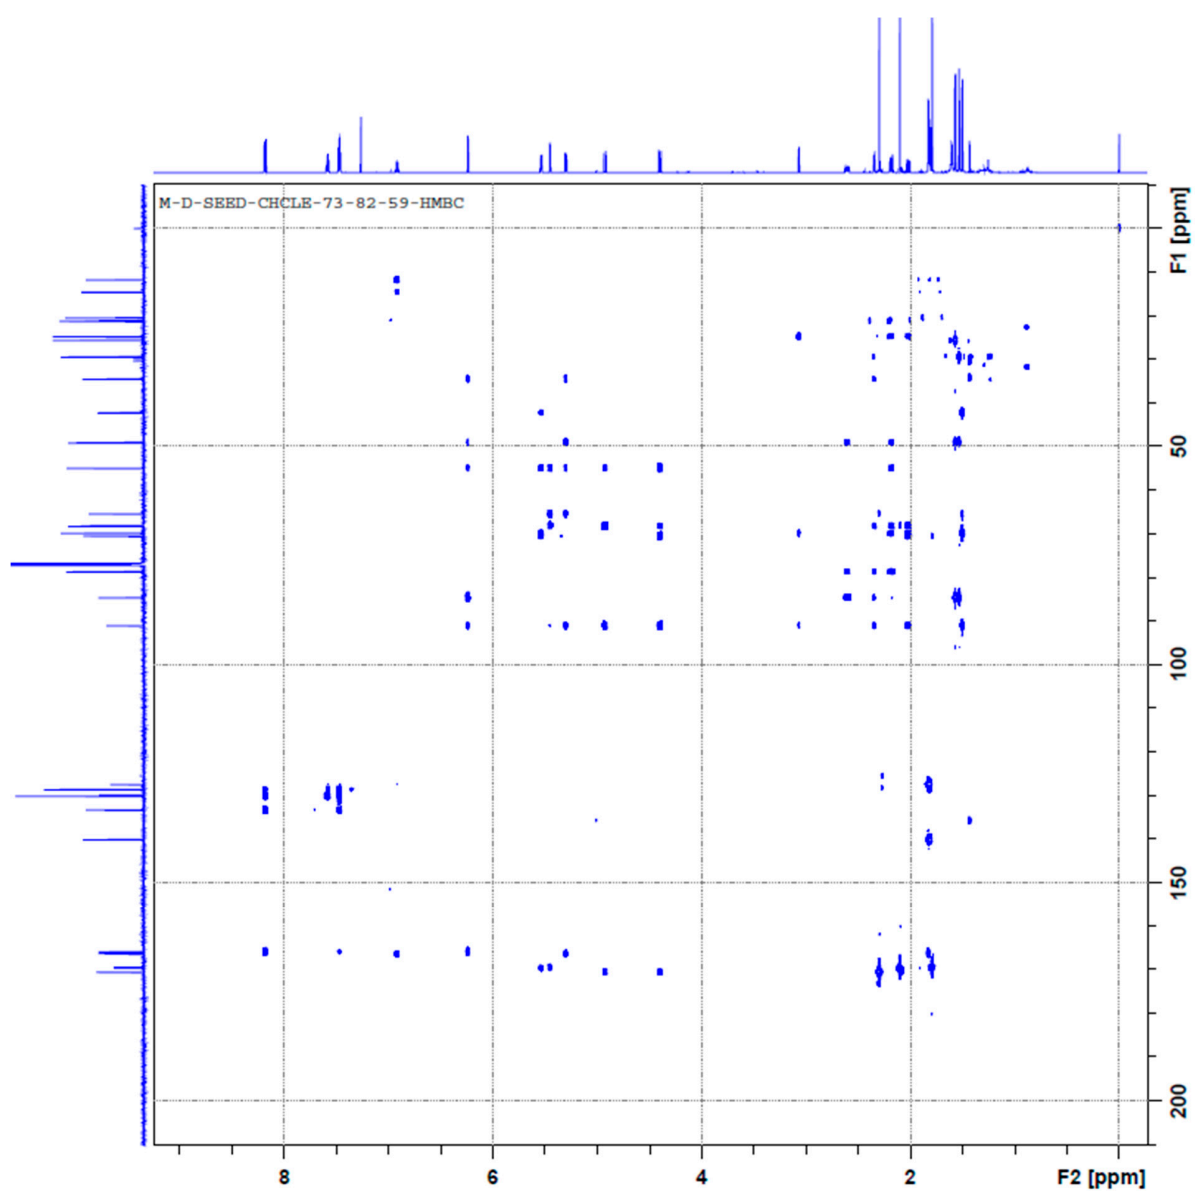

**Figure S4:** HMBC spectrum of compound 1

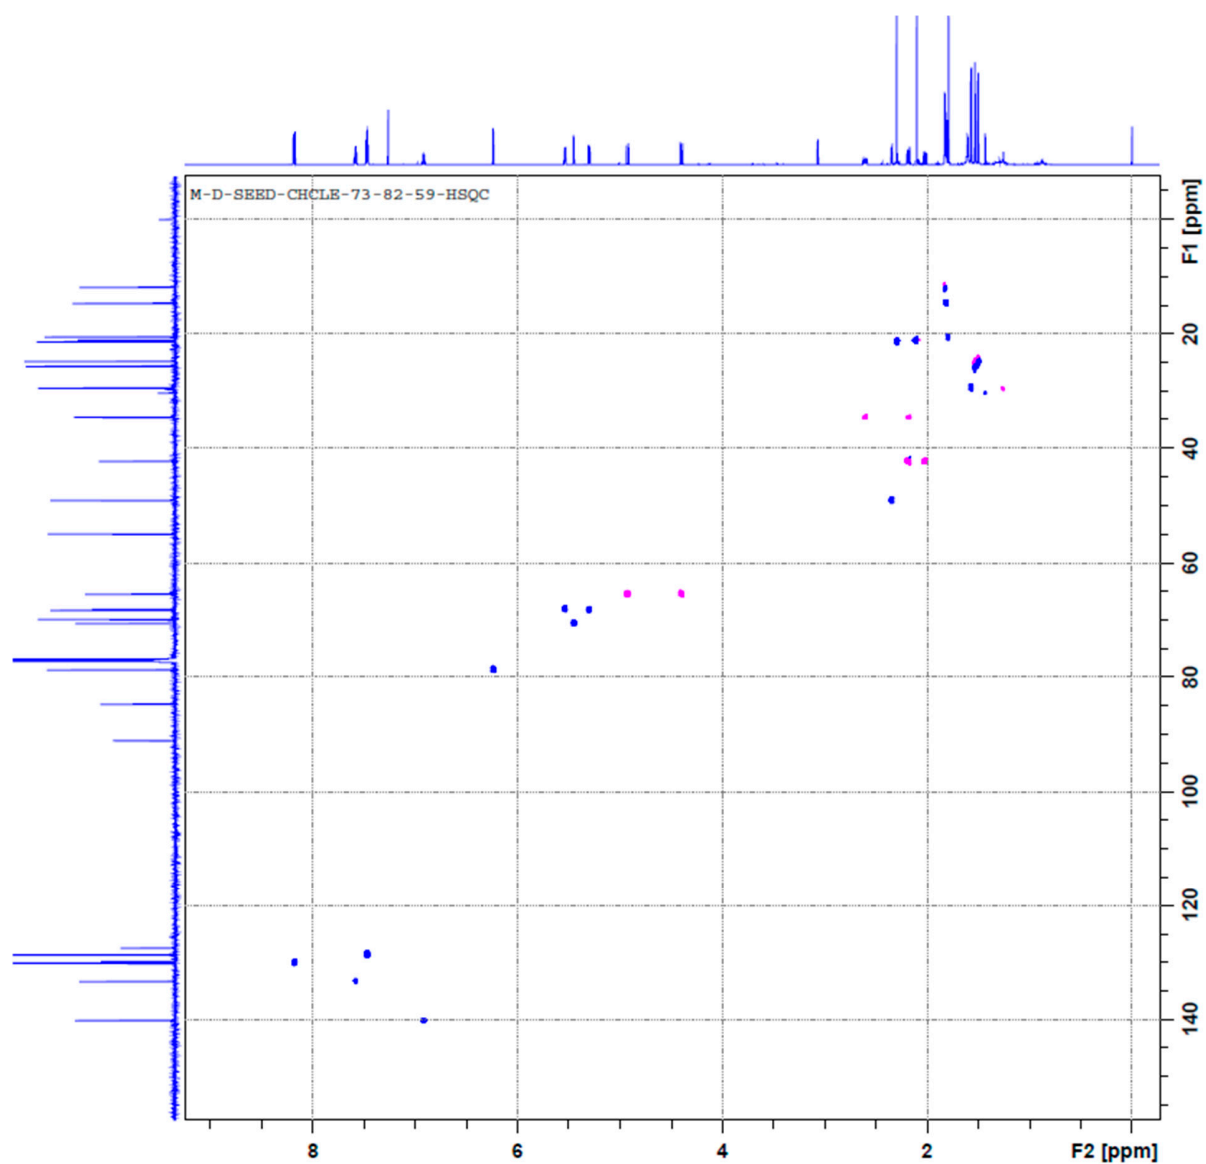

Figure S5: HMBC spectrum of compound 1

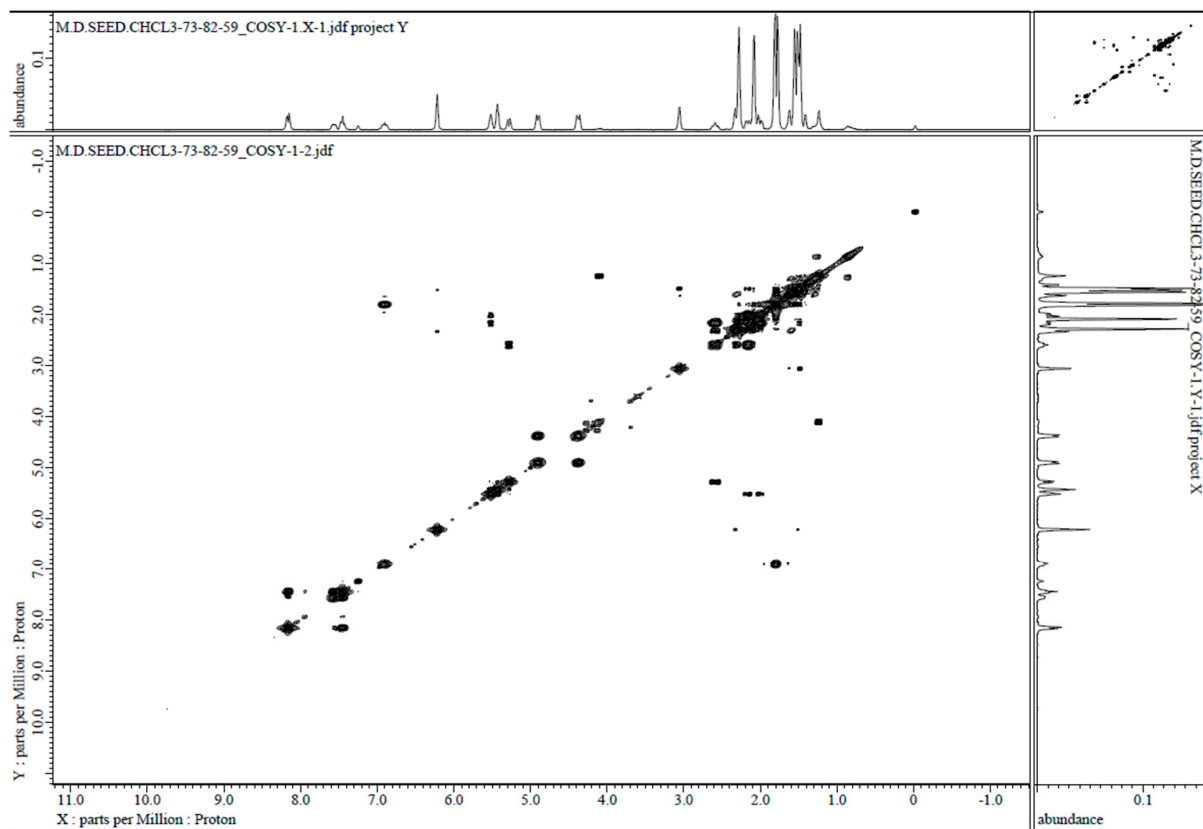

**Figure S6:**  $^1\text{H}$ - $^1\text{H}$  COSY spectrum of compound **1**

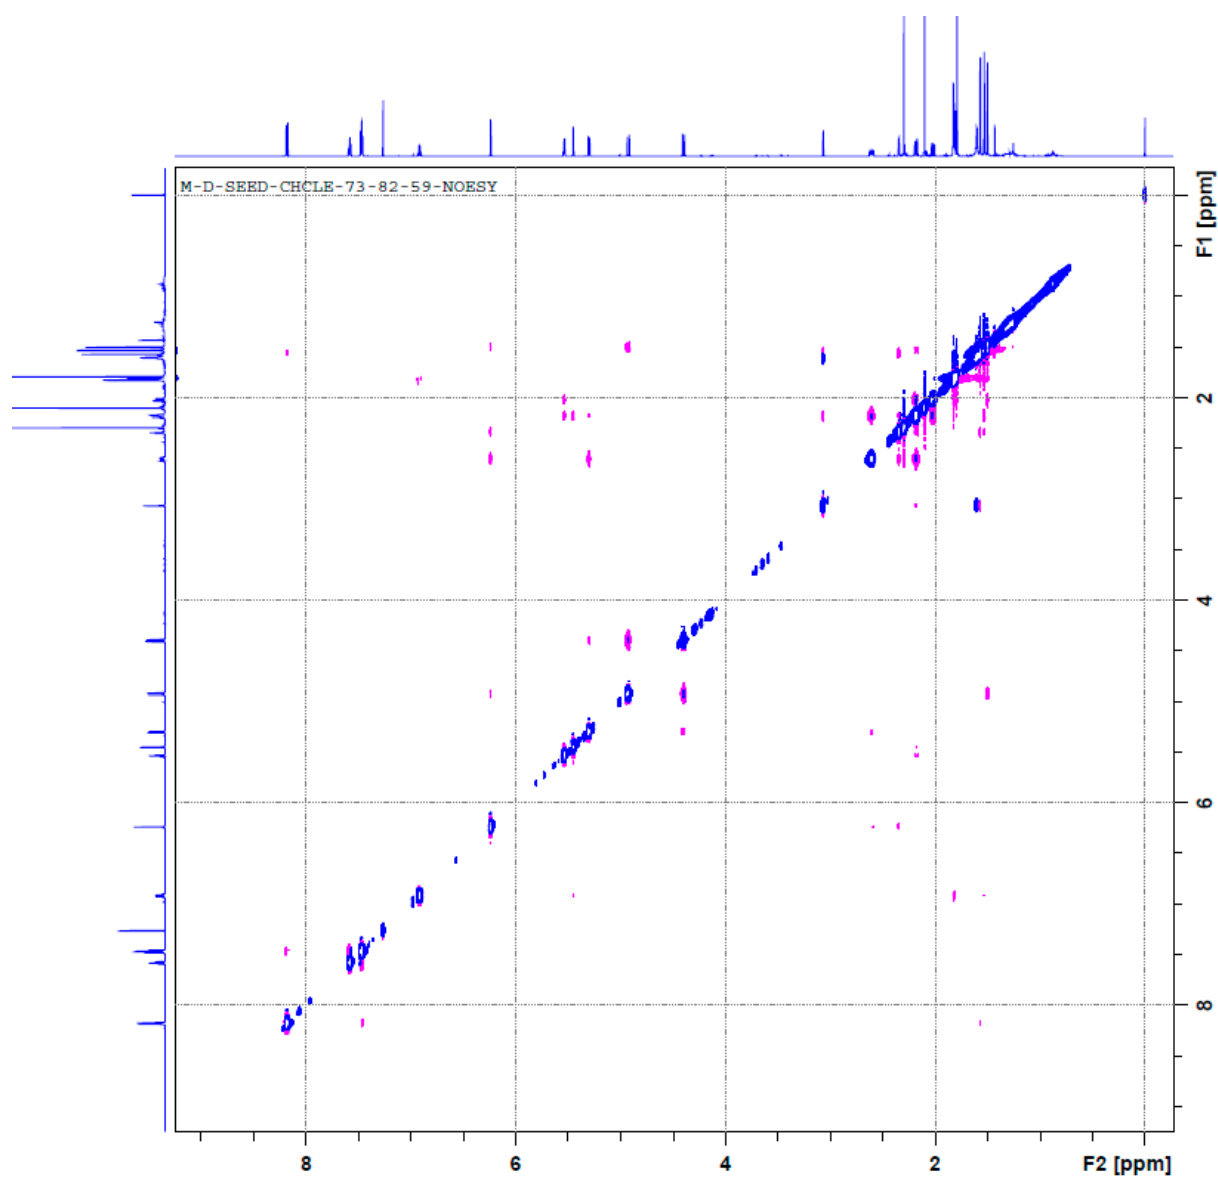

**Figure S7:** NOESY spectrum of compound **1**



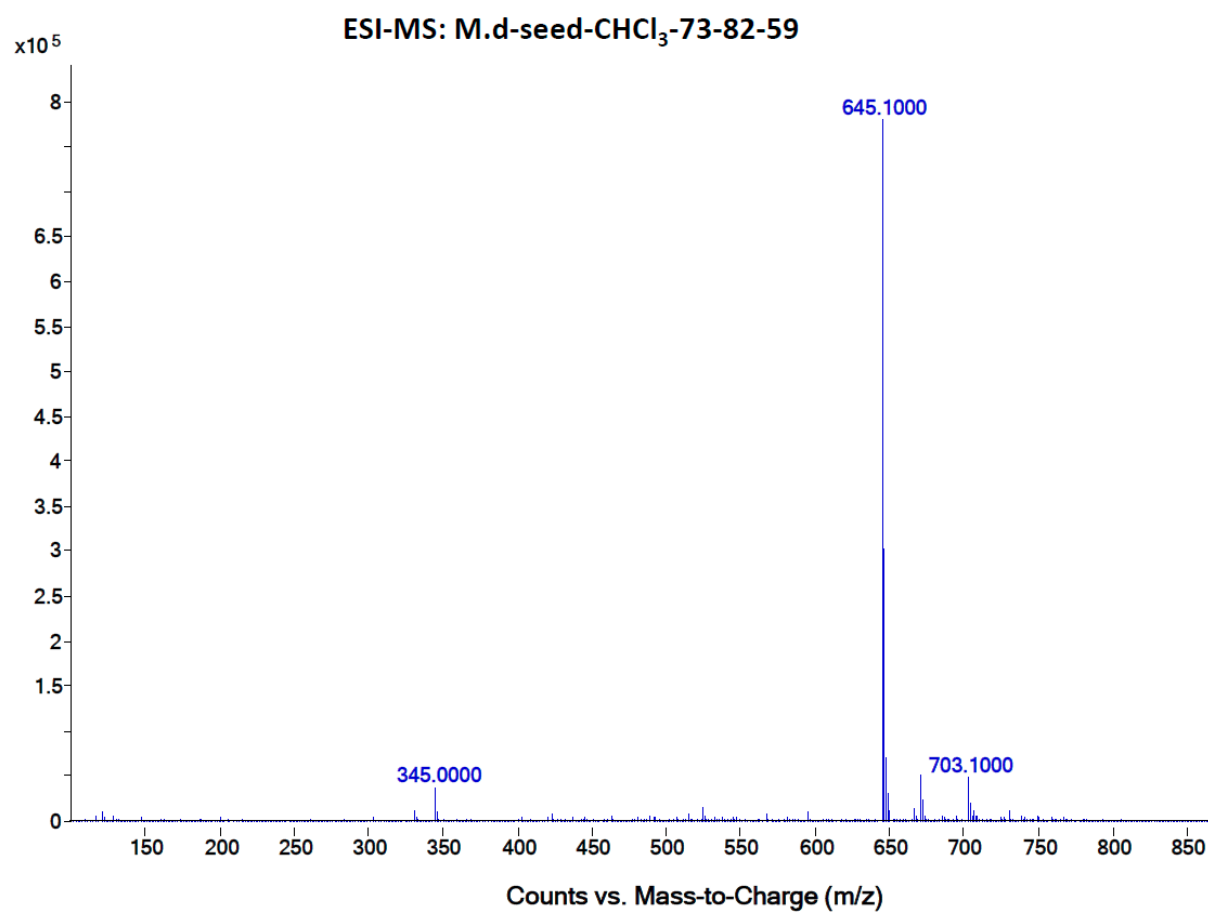

**Figure S8:** ESI MS spectrum of compound **1**

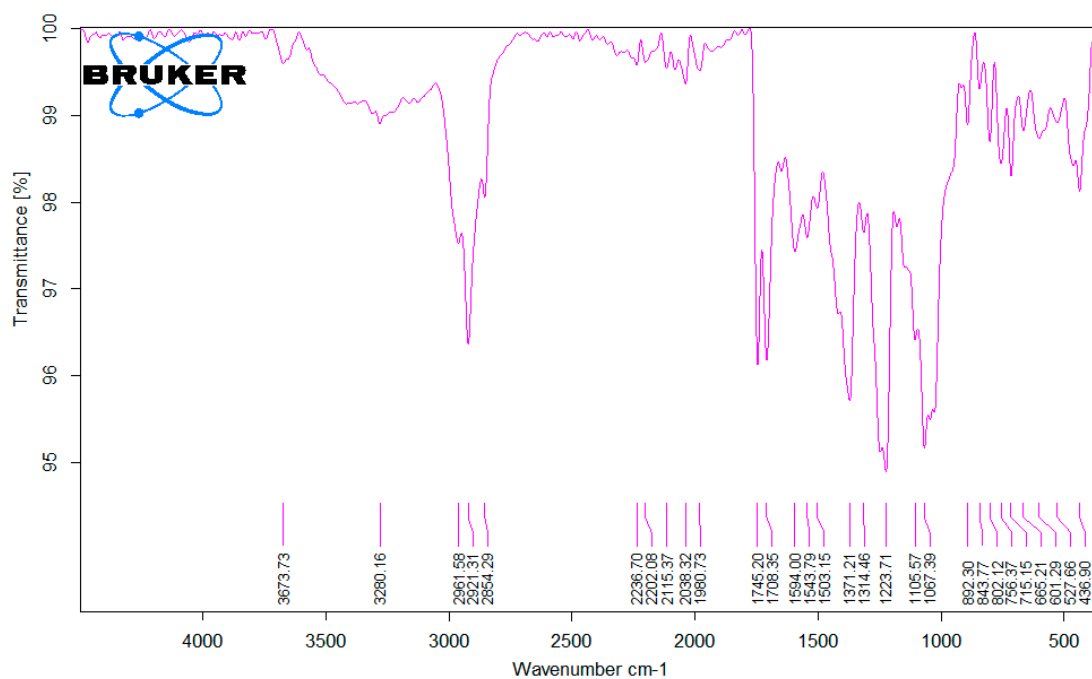

C:\Data\2023\MARCH 2023\I-325\I-M-D-SEED-CHCI3-73-82-59-1.0

I-M-D-SEED-CHCI3-73-82-59-1

30-Mar-23

**Figure S9:** FT IR spectrum of compound **1**

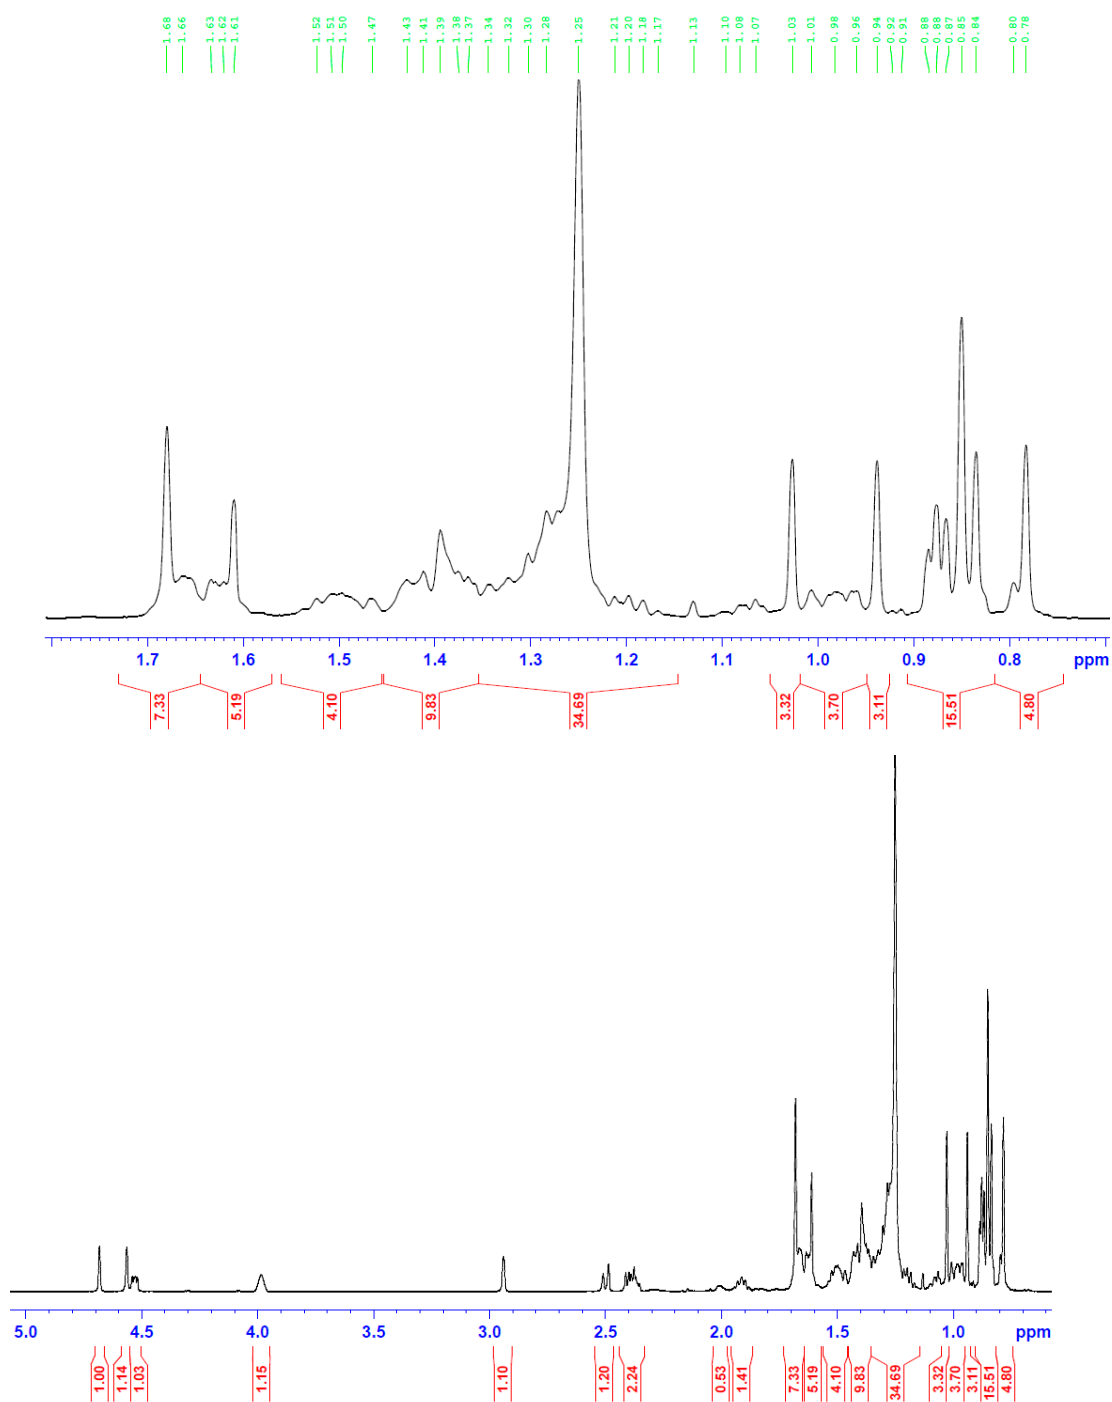

**Figure S10:**  $^1\text{H}$  NMR (700 MHz,  $\text{CHCl}_3-d$ ) of compound 2

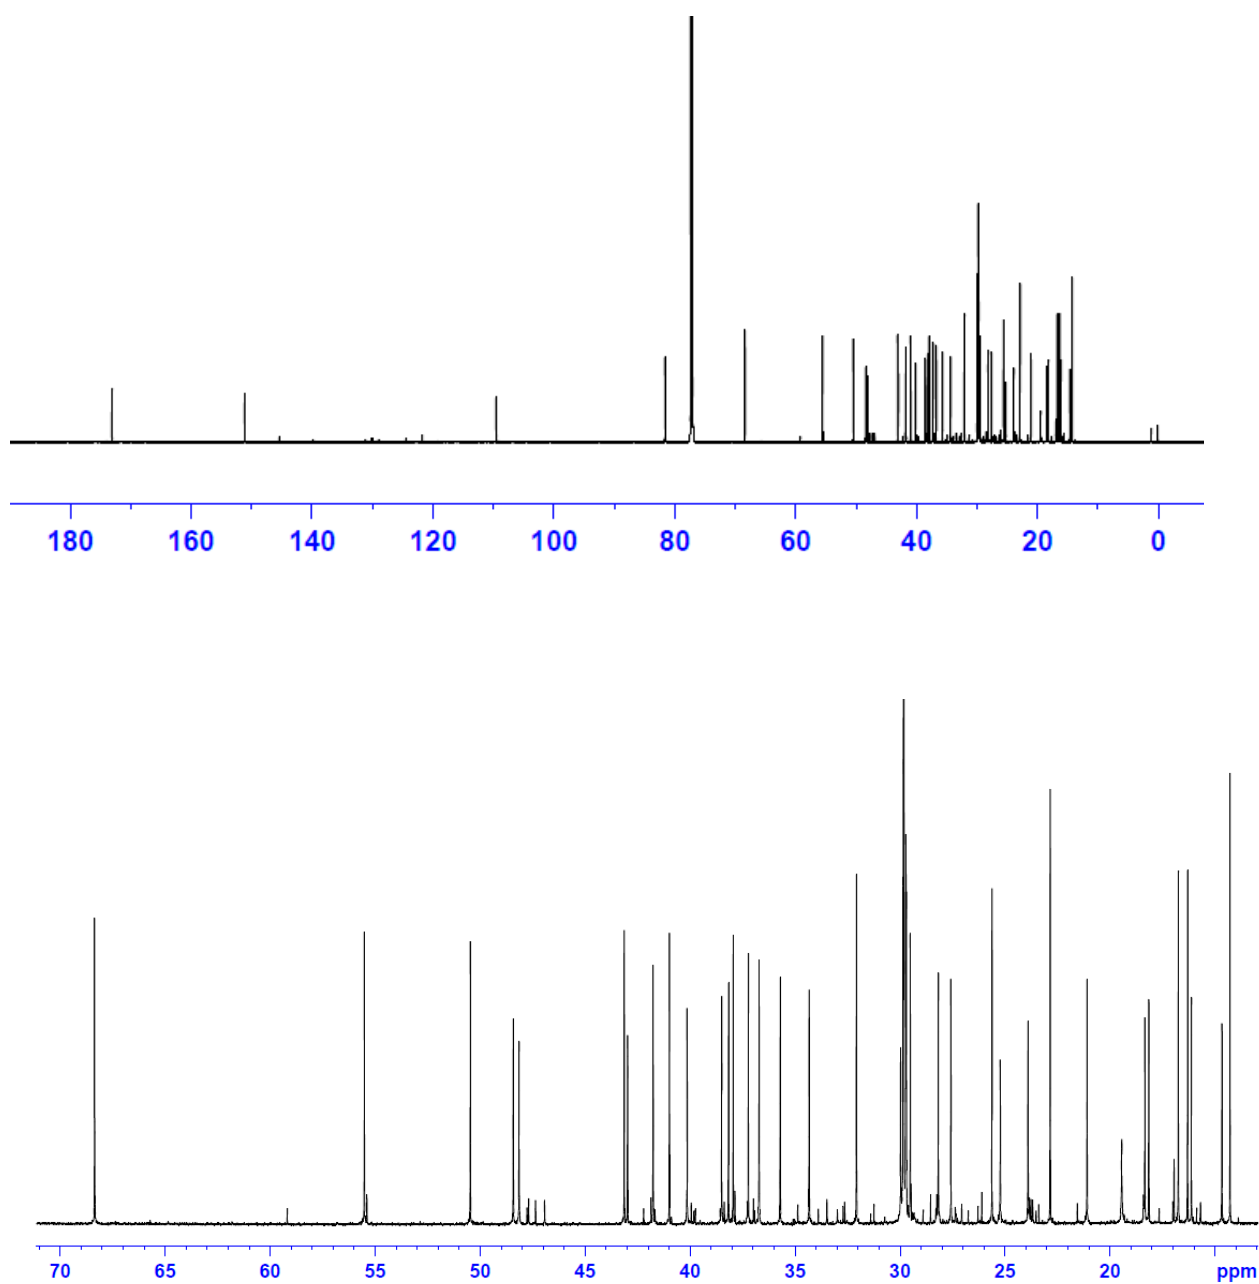

**Figure S11:**  $^{13}\text{C}$  NMR (176 MHz, Chloroform-*d*) of compound 2

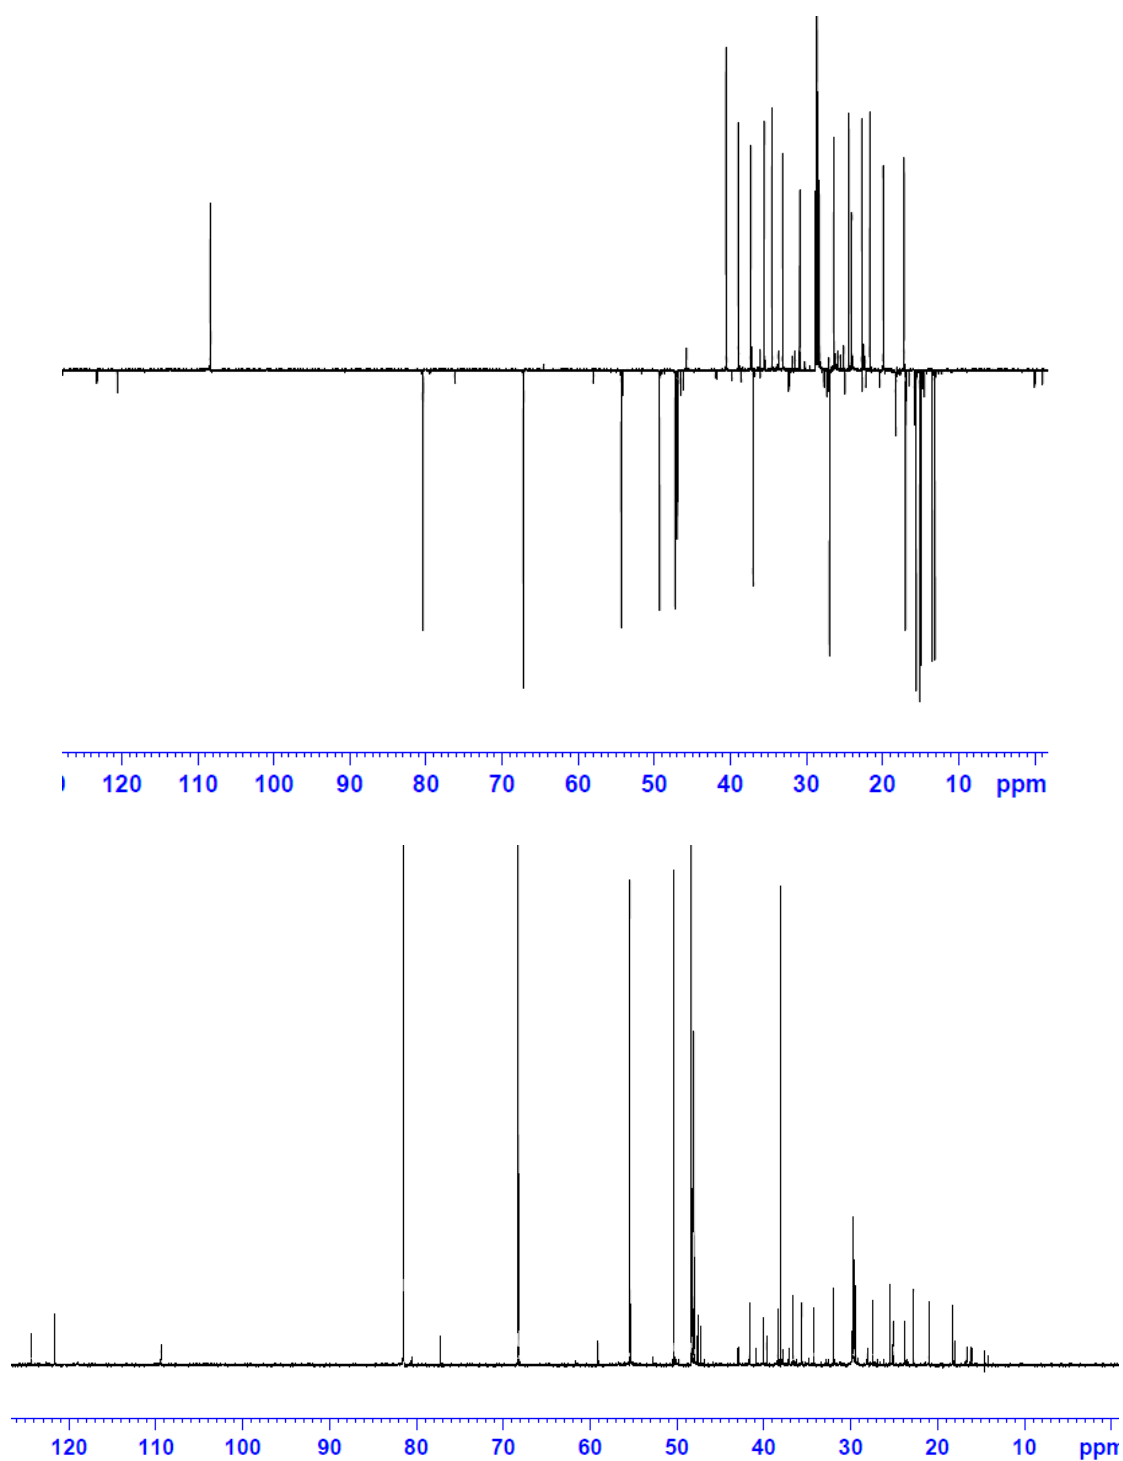

**Figure S12:** DEPT-135 and 90 (176 MHz, Chloroform-*d*) compound 2

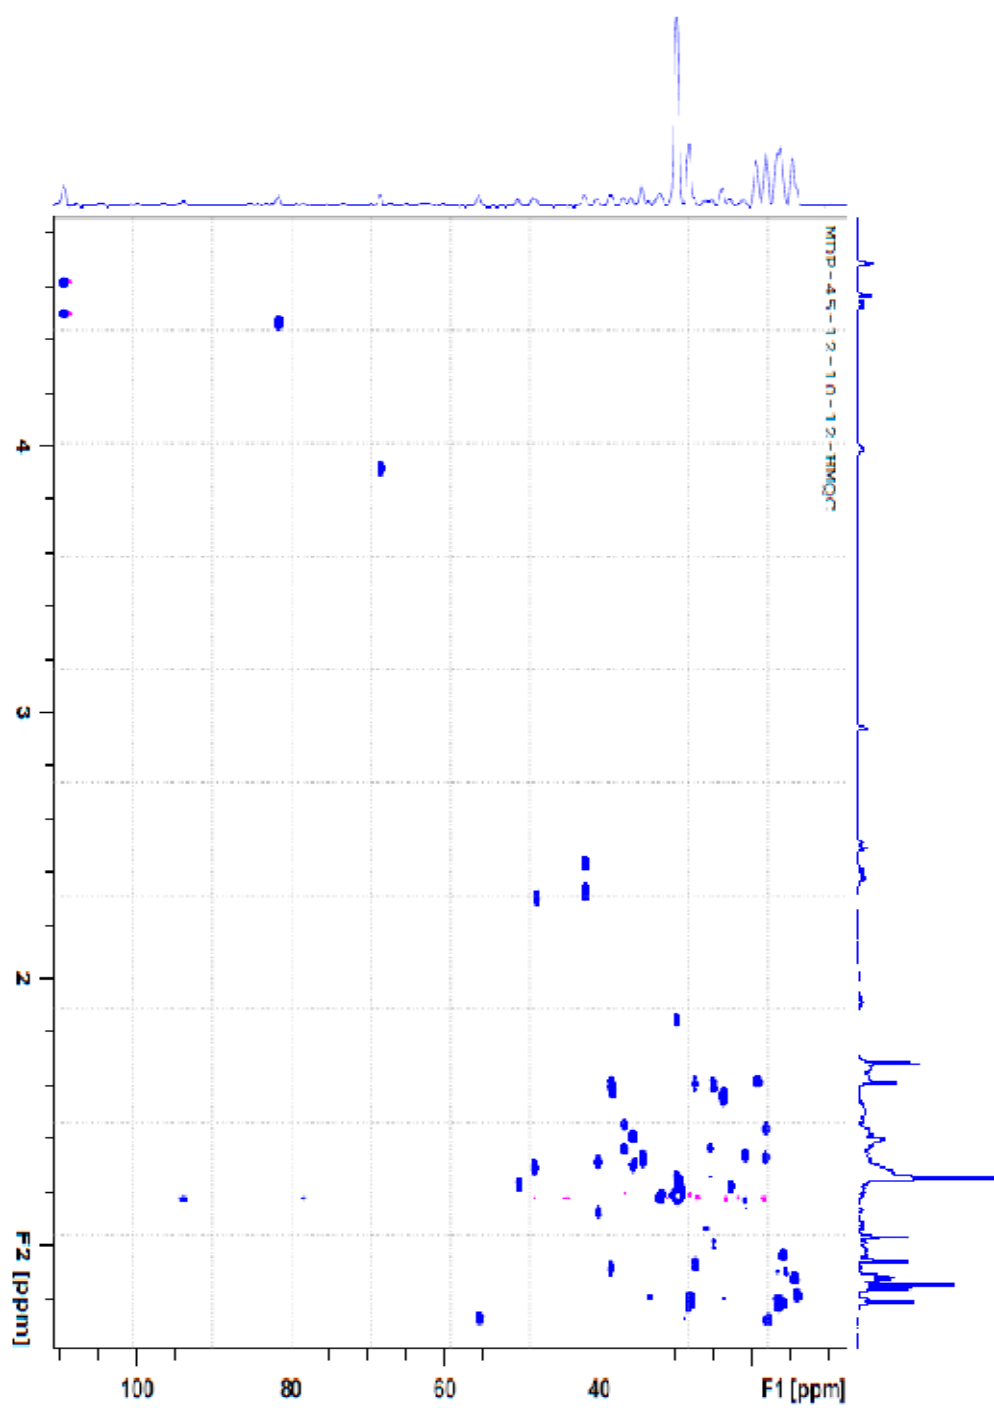

Figure S13: HMQC of compound 2

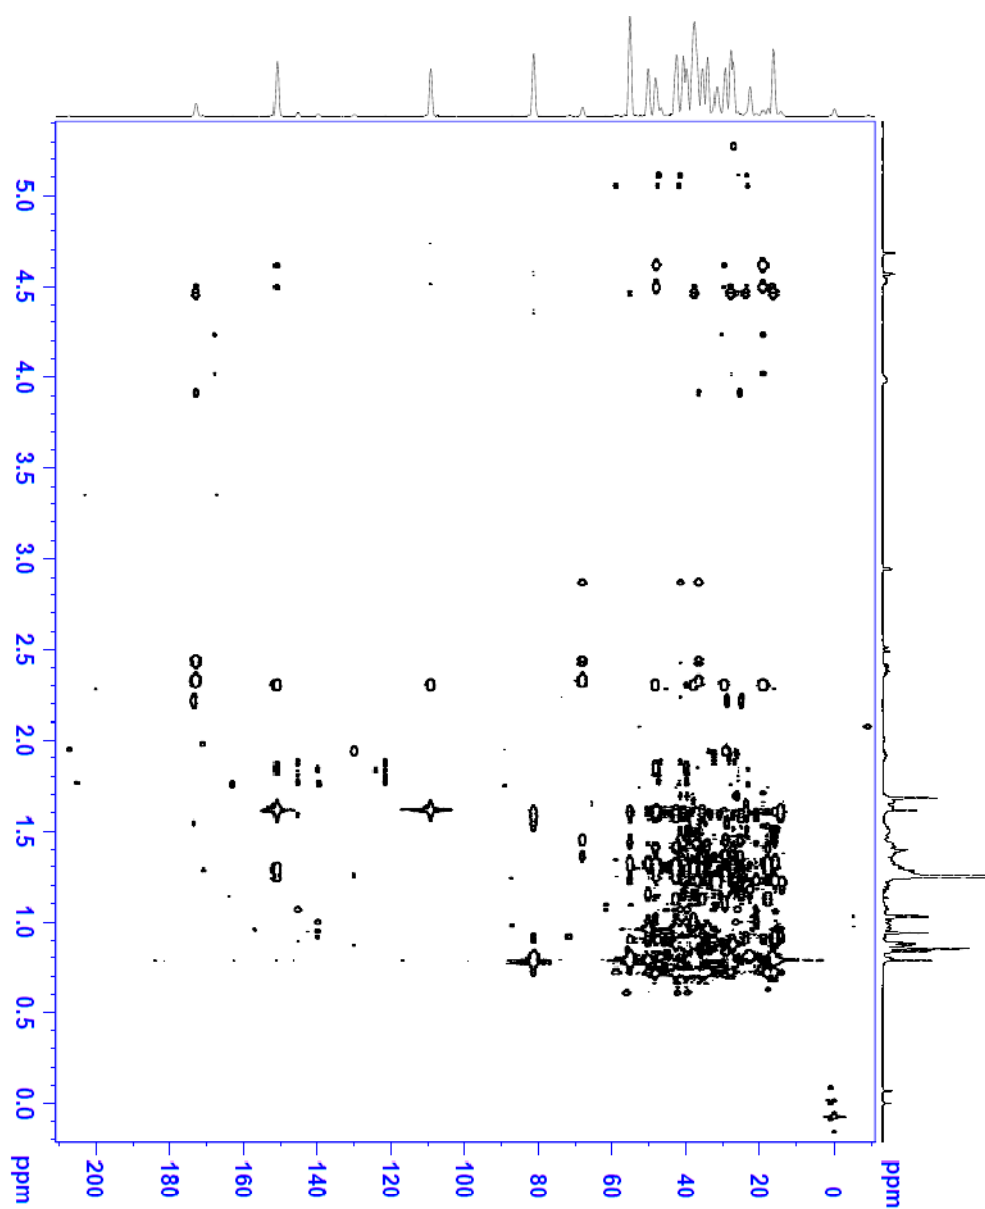

Figure S14: HMBC of compound 2

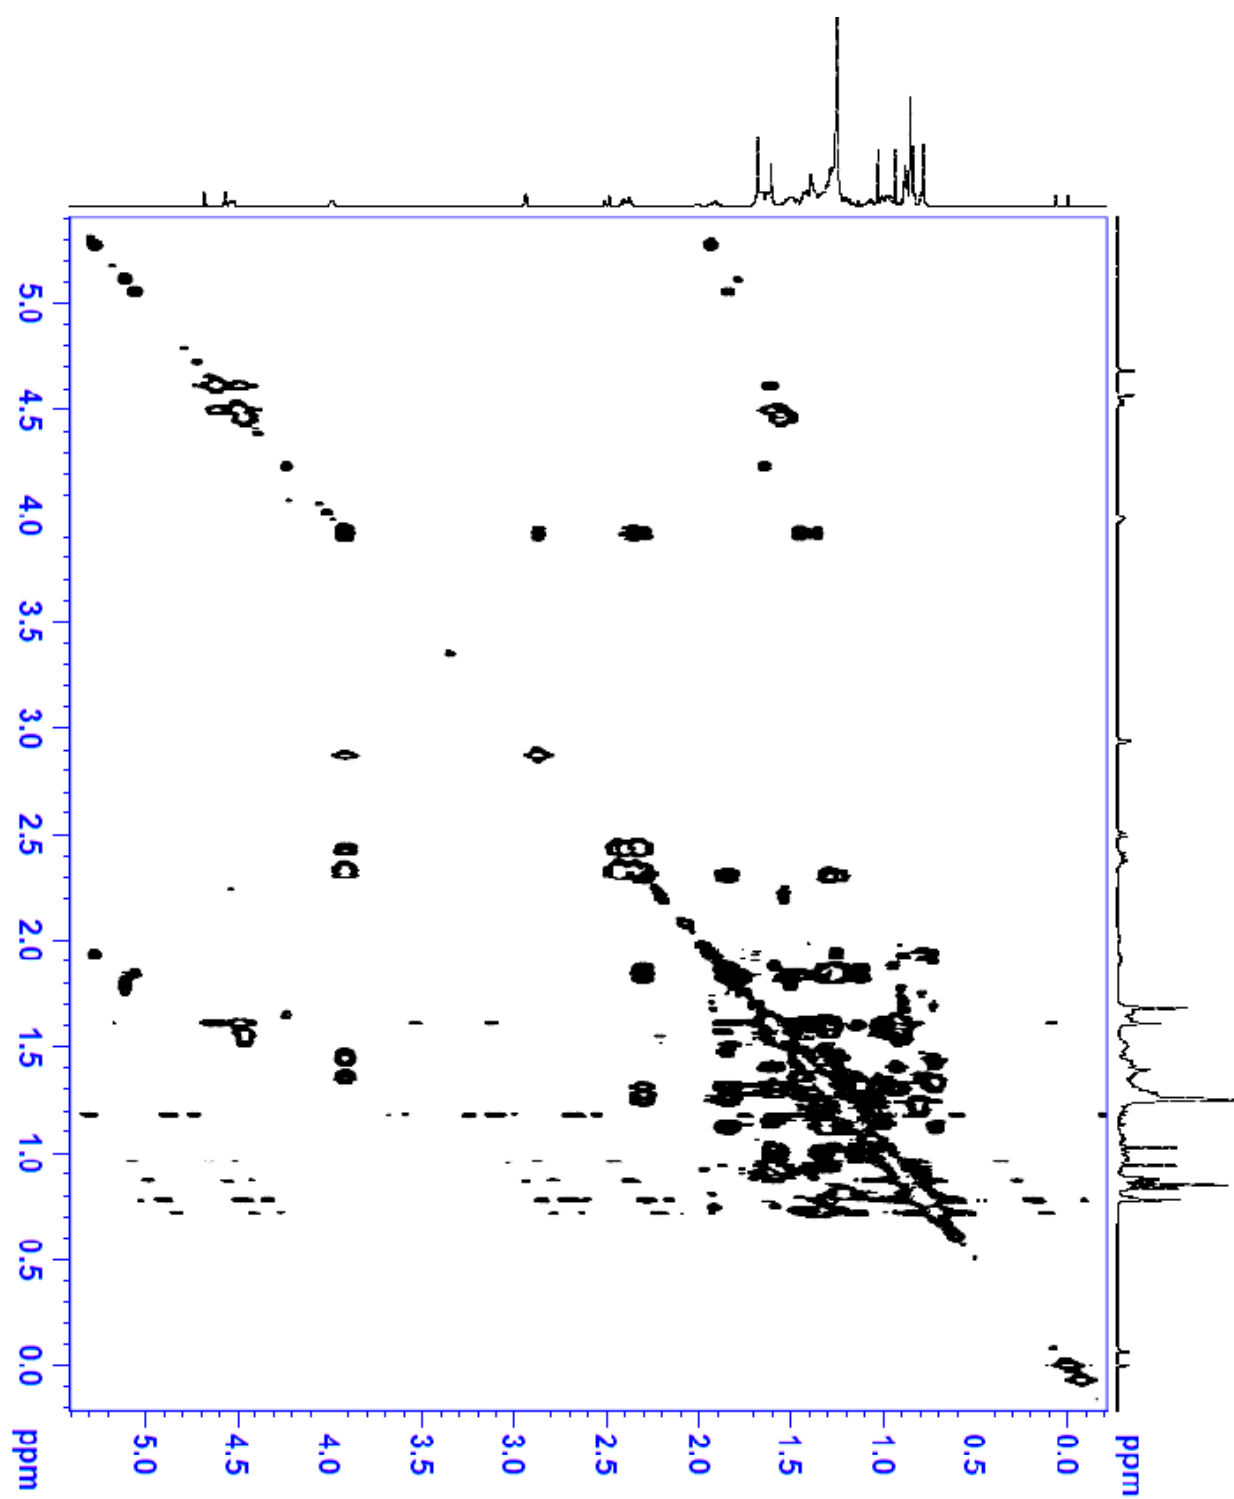

Figure S15:  $^1\text{H}$ - $^1\text{H}$  COSY compound 2



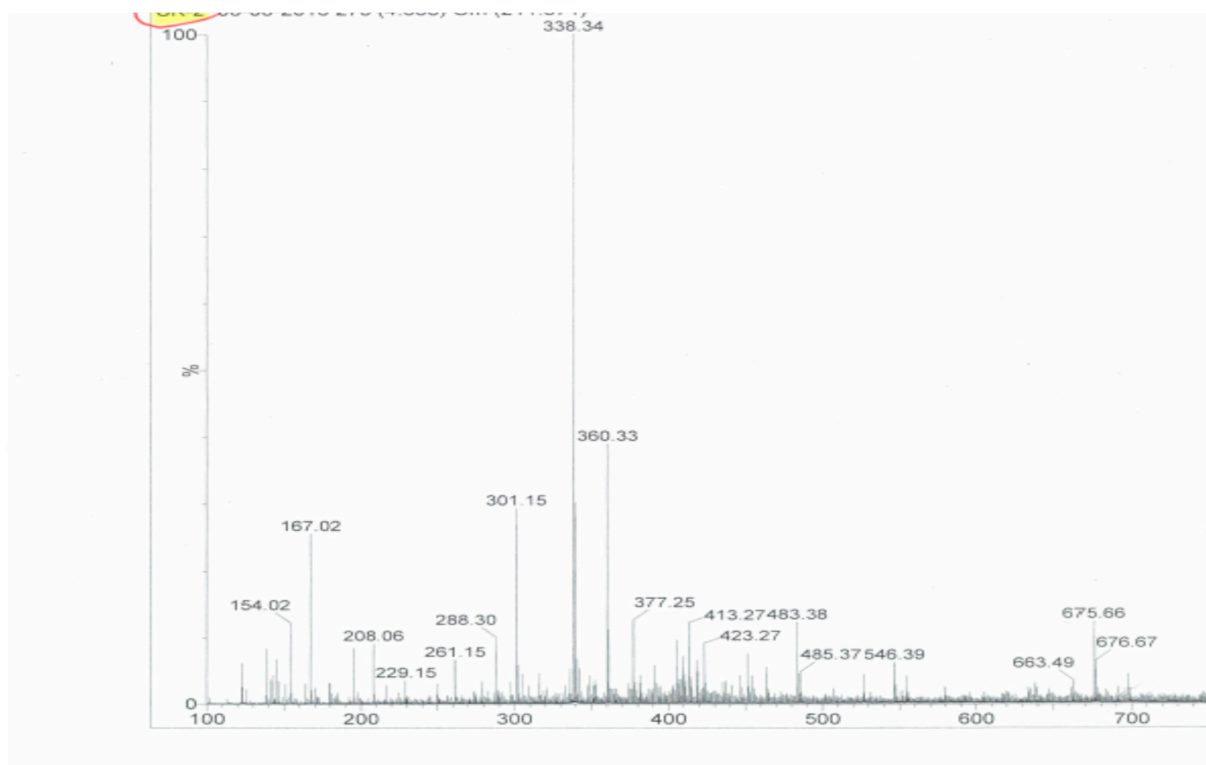

**Figure S16:** ESI MS spectrum of compound **2**

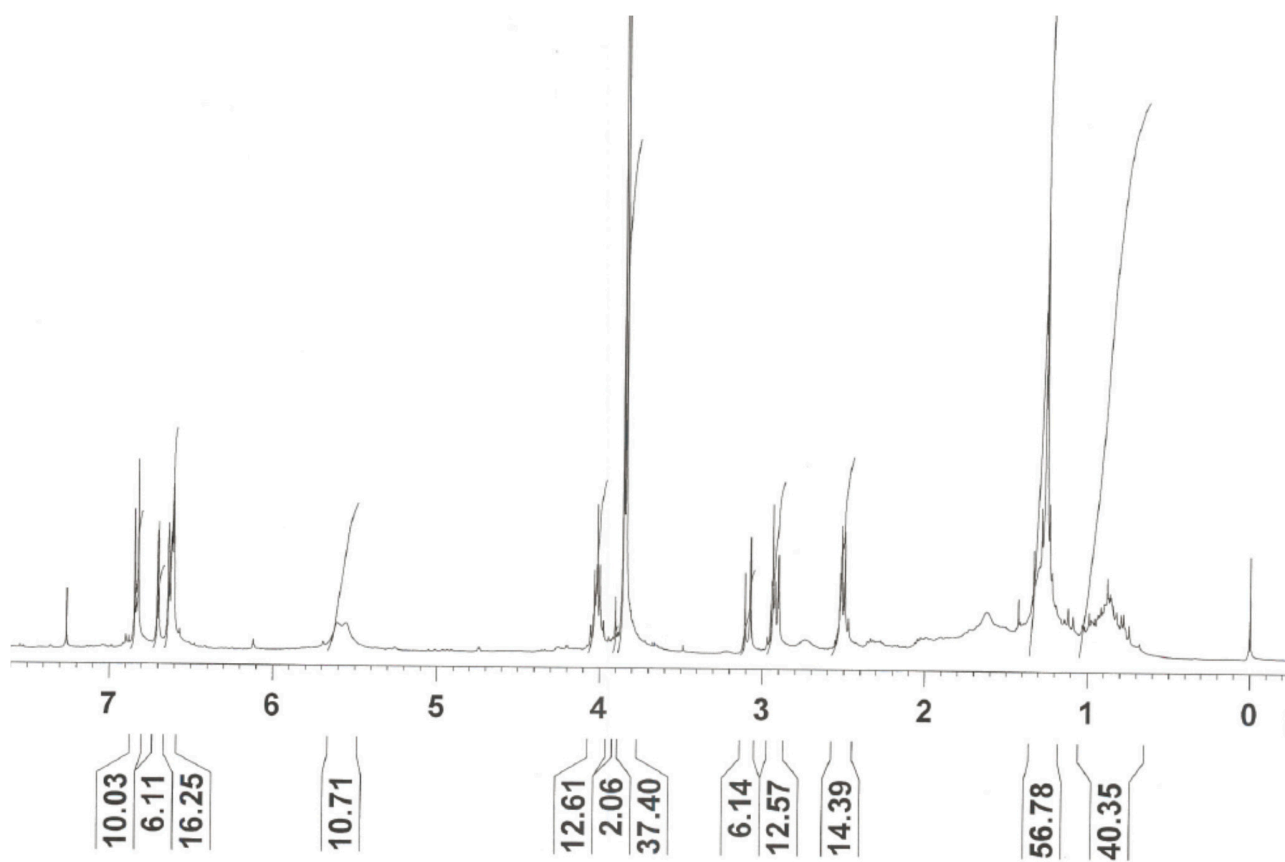

**Figure S17:**  $^1\text{H}$  NMR (400 MHz, Chloroform-*d*) of compound 3

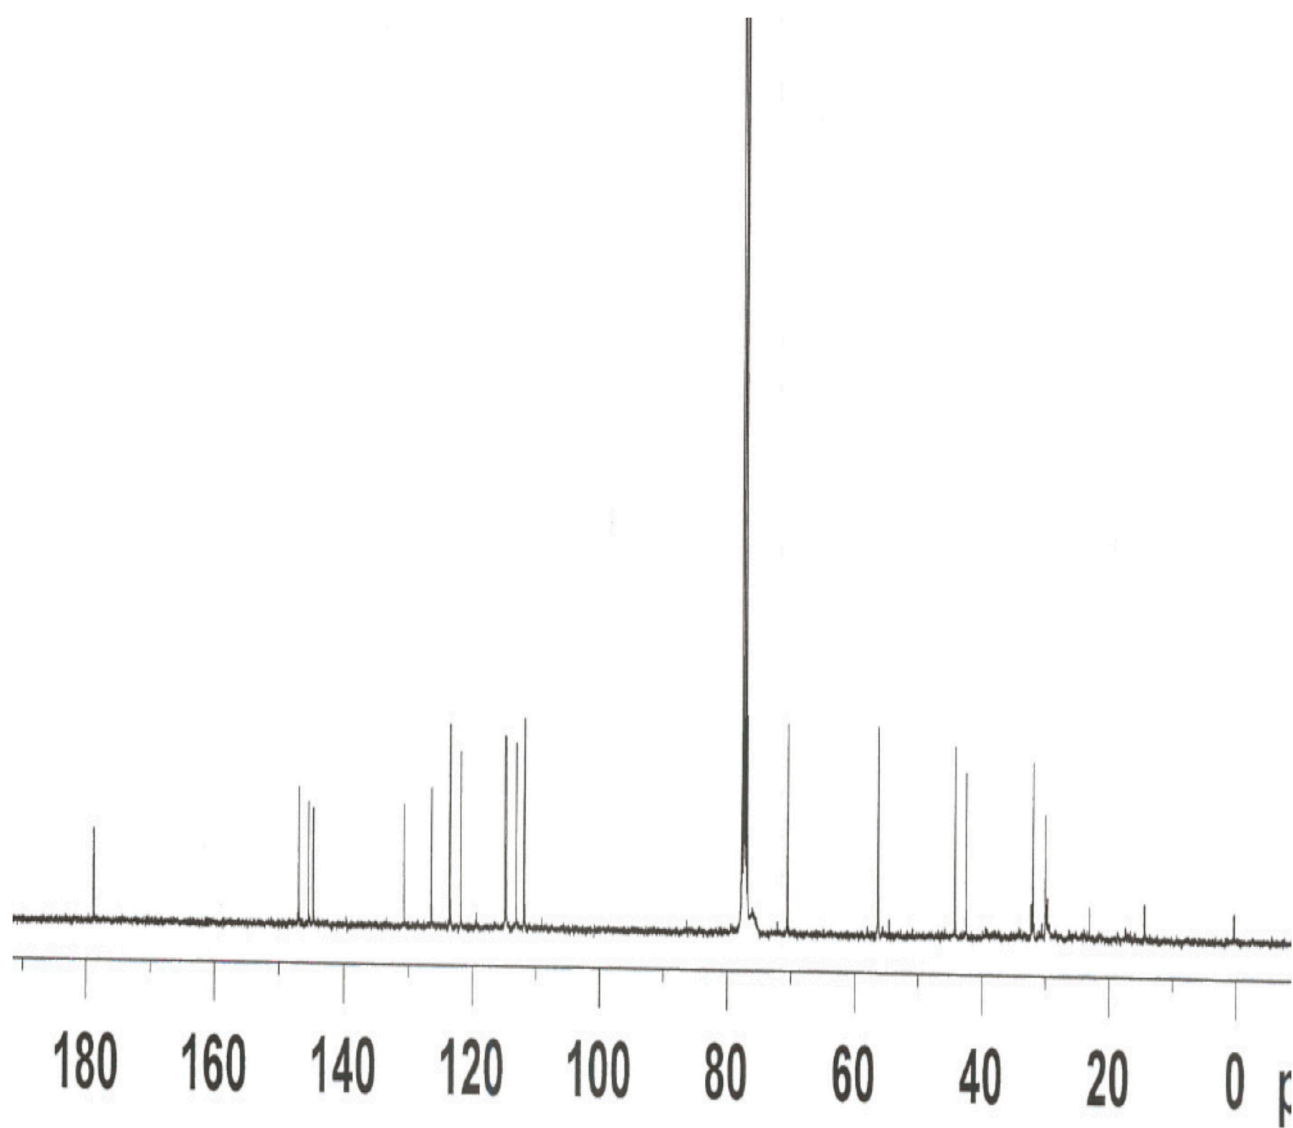

**Figure S18:**  $^{13}\text{C}$  NMR (100 MHz, Chloroform-*d*) of compound 3

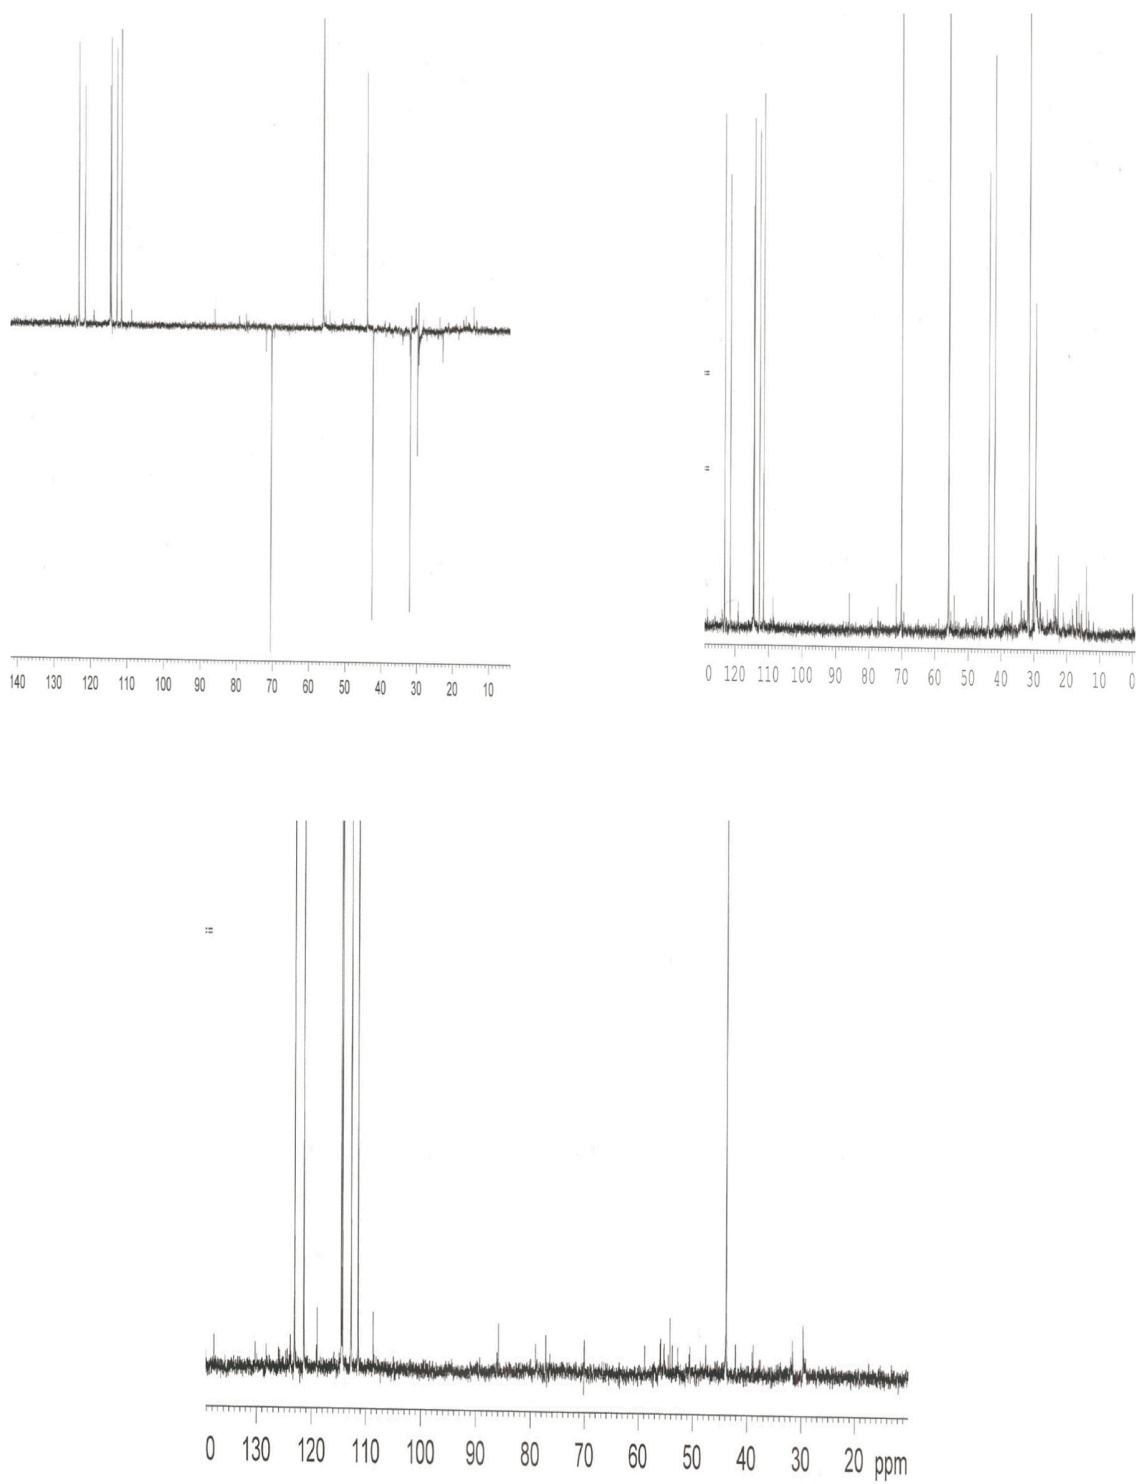

**Figure S19:** DEPT-135, 90 and 45 (100 MHz, Chloroform-*d*) of compound **3**

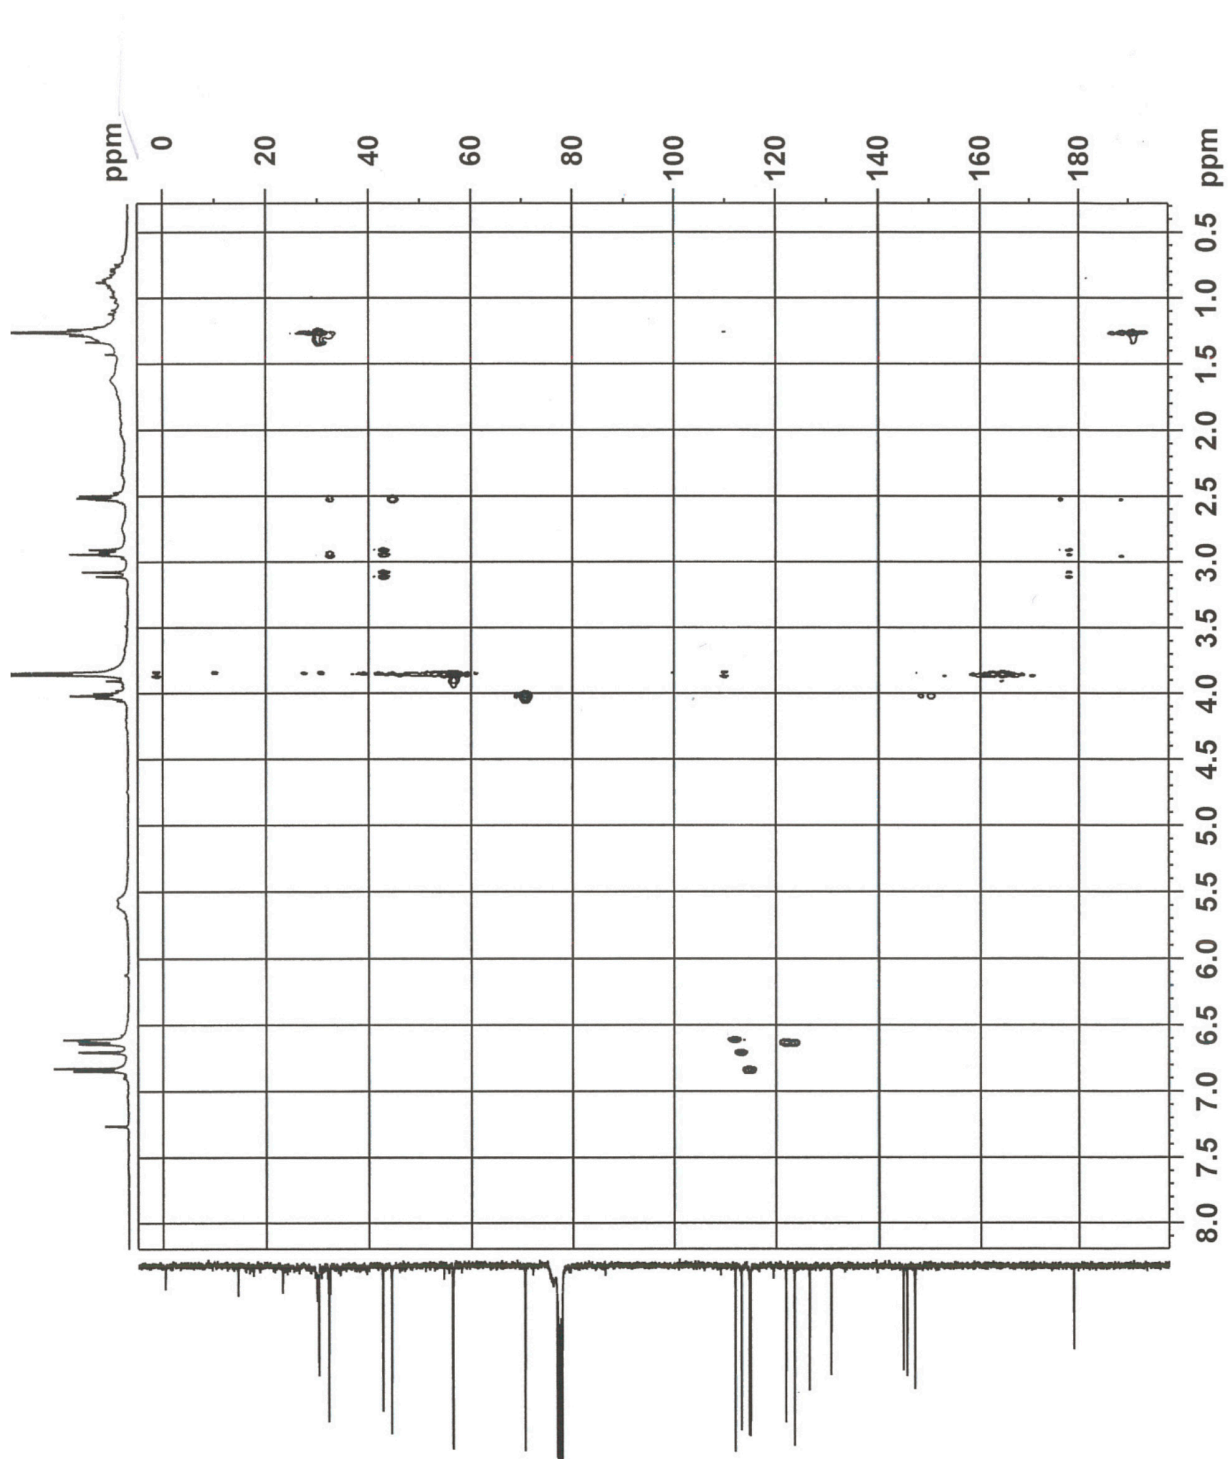

**Figure S20:** HMQC of compound 3

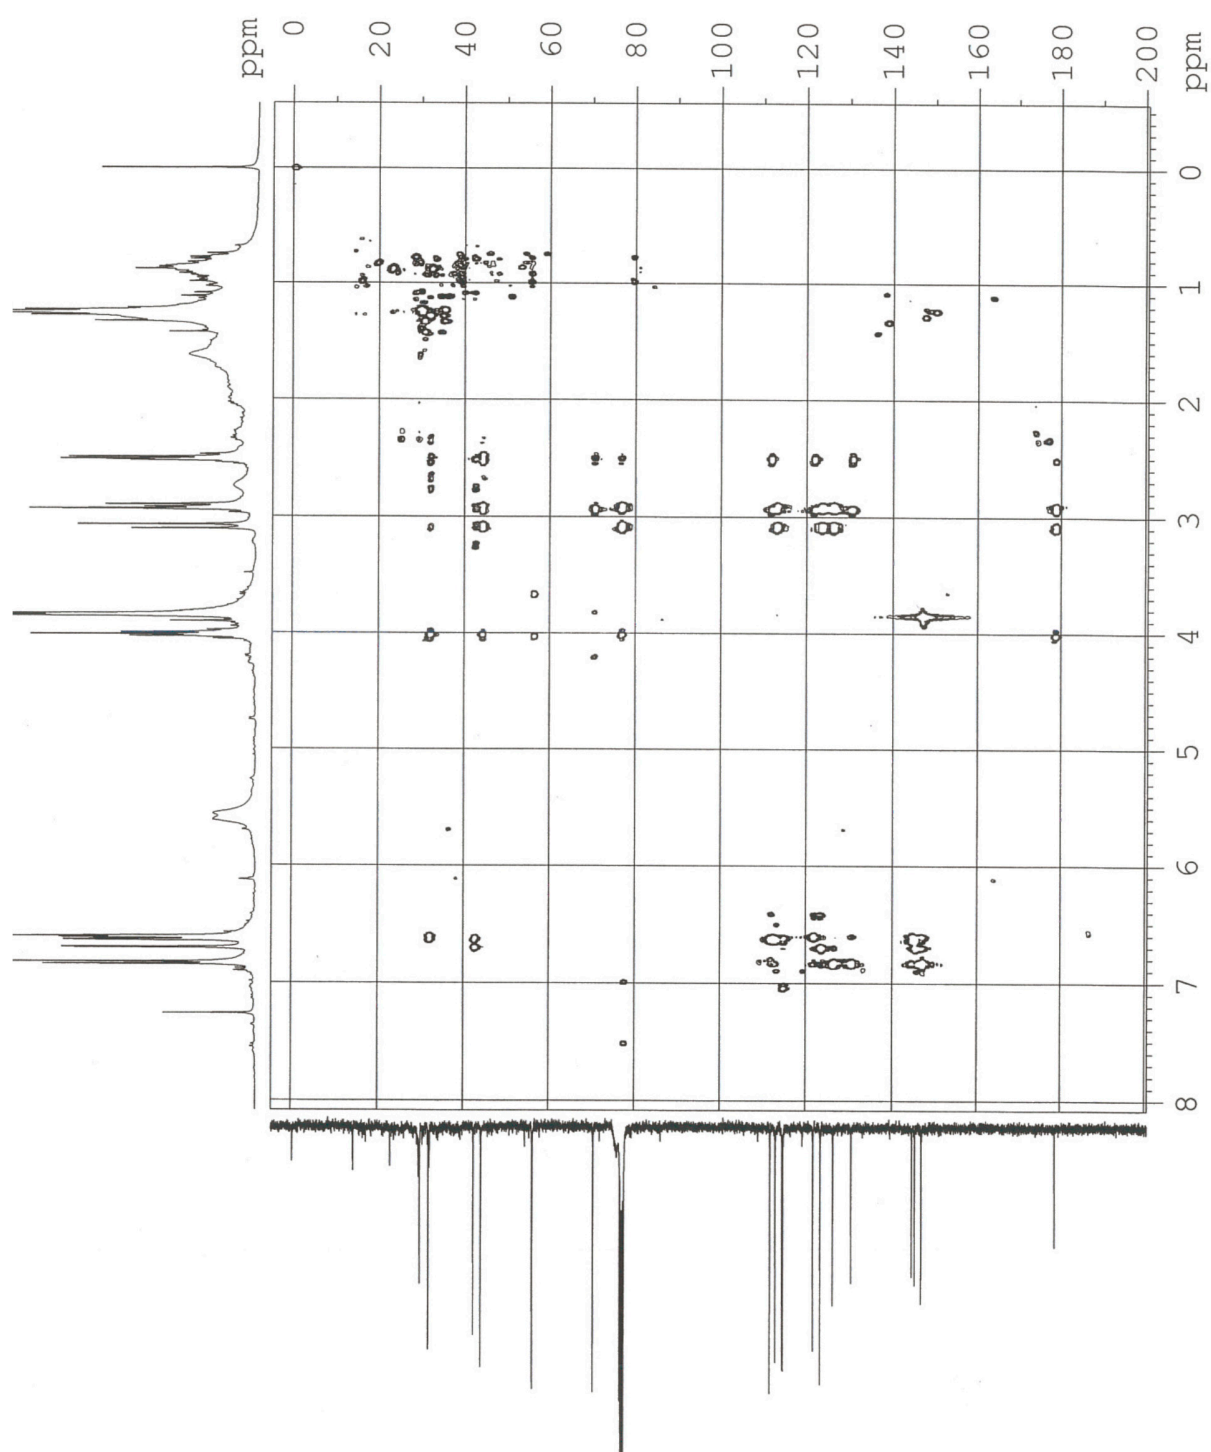

**Figure S21:** HMBC of compound **3**

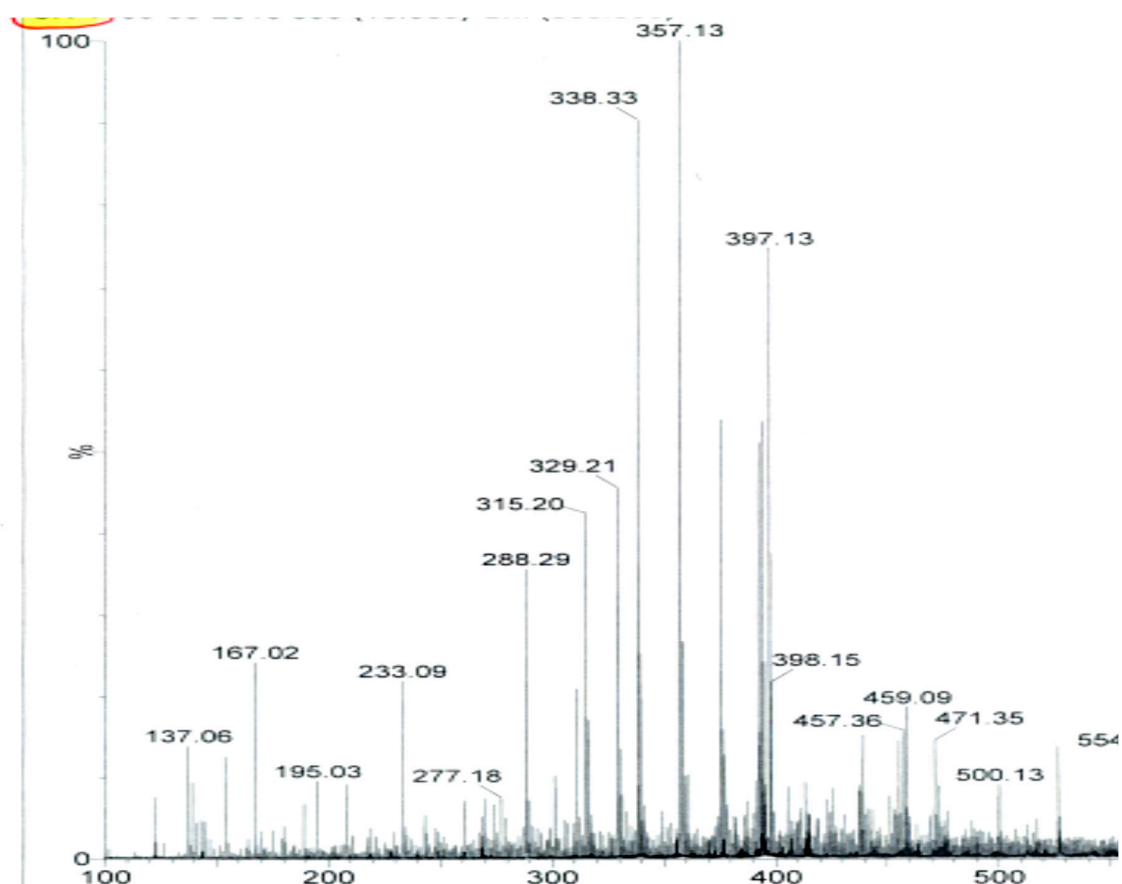

**Figure S22:** ESI MS spectrum of compound **3**

**Table S1:** Comparison of the predicted chemical shifts for diastereoisomers 9*R* and 9*S* of compound 3. Atom numbering is as in the Manuscript.

| Position | 9 <i>R</i>   |              | 9 <i>S</i>   |              |
|----------|--------------|--------------|--------------|--------------|
|          | $\delta_C^a$ | $\delta_H^a$ | $\delta_C^a$ | $\delta_H^a$ |
| 1        | 71.7         | 4.51         | 70.9         | 4.21         |
| 2        | 78.8         | 5.25         | 73.0         | 5.32         |
| 3        | 37.6         | 2.37, 2.03   | 38.1         | 2.24, 2.23   |
| 4        | 74.2         |              | 73.7         |              |
| 5        | 89.3         |              | 88.9         |              |
| 6        | 78.1         | 6.12         | 80.9         | 6.54         |
| 7        | 47.5         | 2.27         | 46.8         | 2.45         |
| 8        | 26.8         | 2.83, 1.86   | 32.6         | 2.59, 2.31   |
| 9        | 67.5         | 5.67         | 76.3         | 4.40         |
| 10       | 58.9         |              | 58.5         |              |
| 11       | 82.7         |              | 83.5         |              |
| 12       | 27.2         | 1.47         | 26.7         | 1.12         |
| 13       | 24.2         | 1.37         | 22.0         | 1.49         |
| 14       | 27.3         | 1.48         | 24.4         | 1.64         |
| 15       | 65.9         | 4.58, 4.40   | 64.6         | 4.30, 3.98   |
| 2'       | 149.5        |              | 149.6        |              |
| 3'       | 133.3        |              | 133.0        |              |
| 4'       | 135.2        | 7.58         | 135.1        | 7.74         |
| 5'       | 121.2        | 7.13         | 120.3        | 7.30         |
| 6'       | 143.7        | 8.39         | 143.3        | 8.60         |
| 7'       | 133.3        | 7.29         | 128.5        | 7.26         |
| 8'       | 133.2        |              | 135.7        |              |
| 9'       | 171.6        |              | 172.0        |              |
| 10'      | 16.1         | 2.36         | 15.8         | 2.60         |
| 11'      | 20.0         | 2.49         | 18.7         | 2.48         |
| OAc-6    | 21.1         | 2.19         | 20.8         | 2.29         |
|          | 167.8        |              | 168.7        |              |
| OAc-9    | 21.2         | 2.17         | 18.3         | 2.40         |
|          | 168.3        |              | 168.43       |              |
| OAc-15   | 21.4         | 2.16         | 20.6         | 2.24         |
|          | 168.9        |              | 169.6        |              |

<sup>a</sup>Calculated from the magnetic shielding constants ( $\sigma$ ) computed using the gauge including atomic orbitals (GIAO) method:

$$\delta = \frac{b - \sigma}{-m}$$

For the values shown in the table  $m$  and  $b$  have been optimized by a simple linear regression to best fit the measured values. Optimized values are:

9*R*:  $b_C = 187.224$ ;  $m_C = -1.0705$  and  $b_H = 31.9556$ ;  $m_H = -1.0952$

9*S*:  $b_C = 186.032$ ;  $m_C = -1.0616$  and  $b_H = 31.9831$ ;  $m_H = -1.0745$



**Table S2:** Results of the DP4+ analysis of the comparison of the 9*R* and 9*S* predicted shielding tensors to the measured chemical shifts for compound **3**. Diastereoisomers 9*R* is clearly favoured.

| Data set         | 9 <i>R</i> | 9 <i>S</i> |
|------------------|------------|------------|
| sDP4+ (H data)   | 100.00%    | 0.00%      |
| sDP4+ (C data)   | 99.43%     | 0.57%      |
| sDP4+ (all data) | 100.00%    | 0.00%      |
| uDP4+ (H data)   | 97.33%     | 2.67%      |
| uDP4+ (C data)   | 99.99%     | 0.01%      |
| uDP4+ (all data) | 100.00%    | 0.00%      |
| DP4+ (H data)    | 100.00%    | 0.00%      |
| DP4+ (C data)    | 100.00%    | 0.00%      |
| DP4+ (all data)  | 100.00%    | 0.00%      |

**Table S3:** Predicted chemical shifts for diastereoisomers of compound **3**.

| Position | $\delta_C$ |                                 |                                 | $\delta_H$ |                                 |                                 |
|----------|------------|---------------------------------|---------------------------------|------------|---------------------------------|---------------------------------|
|          | Exp        | Calc<br>7 <i>R</i> -8' <i>R</i> | Calc<br>7 <i>S</i> -8' <i>R</i> | Exp        | Calc<br>7 <i>R</i> -8' <i>R</i> | Calc<br>7 <i>S</i> -8' <i>R</i> |
| 1        | 130.7      | 136.8                           | 140.0                           |            |                                 |                                 |
| 2        | 114.7      | 112.9                           | 110.1                           | 6.69       | 6.55                            | 7.22                            |
| 3        | 144.7      | 146.1                           | 147.3                           |            |                                 |                                 |
| 4        | 147.0      | 146.7                           | 145.4                           |            |                                 |                                 |
| 5        | 113.1      | 106.6                           | 107.8                           | 6.63       | 6.76                            | 6.71                            |
| 6        | 123.6      | 119.1                           | 114.6                           | 6.84       | 7.24                            | 6.66                            |
| 7        | 76.9       | 78.3                            | 78.5                            |            |                                 |                                 |
| 8        | 42.4       | 49.9                            | 48.5                            | 3.10       | 2.80                            | 3.04                            |
|          |            |                                 |                                 | 2.91       | 2.74                            | 2.21                            |
| 9        | 179.1      | 170.6                           | 170.6                           |            |                                 |                                 |
| 1'       | 126.5      | 134.7                           | 133.8                           |            |                                 |                                 |
| 2'       | 111.9      | 113.0                           | 111.4                           | 6.6        | 6.88                            | 6.53                            |
| 3'       | 147.4      | 147.5                           | 148.0                           |            |                                 |                                 |
| 4'       | 145.4      | 145.3                           | 145.1                           |            |                                 |                                 |
| 5'       | 114.9      | 106.5                           | 107.0                           | 6.82       | 6.44                            | 6.57                            |
| 6'       | 121.9      | 119.5                           | 119.3                           | 6.62       | 6.21                            | 6.43                            |
| 7'       | 31.9       | 33.3                            | 34.4                            | 2.59       | 3.41                            | 2.25                            |
|          |            |                                 |                                 | 2.49       | 1.45                            | 2.20                            |
| 8'       | 44.20      | 44.2                            | 49.5                            | 2.52       | 2.41                            | 2.24                            |
| 9'       | 70.7       | 71.1                            | 72.5                            | 3.99       | 3.70                            | 3.94                            |
|          |            |                                 |                                 | 4.04       | 3.85                            | 4.54                            |

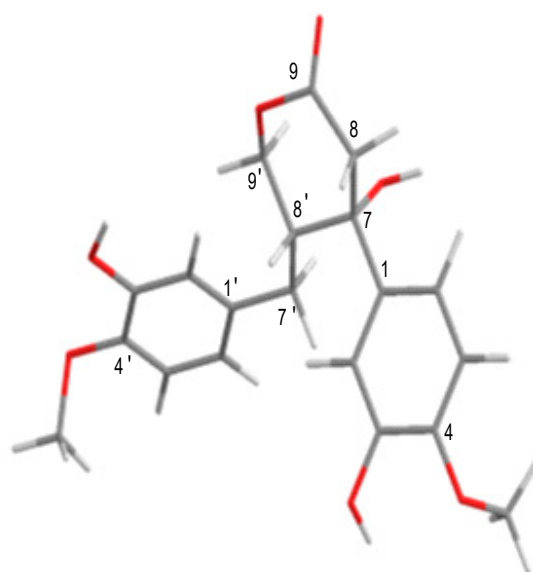

**Figure S23.** Spatial model of arrangement of groups around stereogenic C-8' and C-7 in compound **3**
